# Supplementary material for: Influence of biological maturation status on selected anthropometric and physical fitness variables in adolescent male volleyball players
Source: PeerJ. 2022 Apr 5;10:e13216. doi: 10.7717/peerj.13216 (PMC8992641; doi:10.7717/peerj.13216)
Supplement: Supplemental Information 1 [file peerj-10-13216-s001.xlsx]

## Sheet: Base de datos chicos DEFINITIVA
Participant Code	Age	Body mass	Height	Arm Span	Sitting height	Cormic index	Upper limb length	Iliospinale height	Biacromiale	Biileocrestale	Femur	Humerus	Bistyloid	Corrected arm girth	Corrected thigh girth	Corrected leg girth	Endomorphy	Mesomorphy	Ectomorphy	∑6 Skinfolds	∑8 Skinfolds	Fat mass percentage	Muscle mass percentage	Bone mass percentage	Far mass Kg	Muscle mass Kg	Bone mass Kg	BMI	Muscle-bone index	Biological maturation	APHV	Maturation classification	Sit and Reach	Back scratch	Long jump	Medicine ball throw	CMJ	CMJ power	Sprint	Agility test	Years playing
1	12.6466	52.5	159.65	160.6	81.7497	51.2056	72.1499	89.1999	34.3997	22.6996	10.3498	6.7	5.3	22.053	44.3905	29.63	2.42643	5.70141	2.6341	69.7375	84.1348	18.8198	40.7972	19.5948	9.88041	21.4185	10.2873	20.5978	2.08204	-0.931796	13.5784	2	-16	1.825	1.825	4.035	25.165	571.308	3.47	10.025	3
2	12.9342	47	162.7	158.75	81.9	50.338	71.4499	97.8996	33.3	24.6	9.5	6.3	4.9	18.9606	38.6491	27.3043	2.18024	3.09491	4.42566	48.2901	62.8868	13.7147	37.5725	20.0055	6.4459	17.6591	9.40261	17.7551	1.8781	-0.871838	13.8061	2	-22	-9.625	1.665	4.75	20.395	459.893	4.01	10.515	3
3	13.989	44.6	152.649	154.8	80.25	52.5715	67.4	44.8998	33	22.6996	8.9	6.1	4.5	19.3901	39.9219	28.5388	2.45187	4.55378	2.93246	62.7933	73.9933	16.1396	39.8783	17.2971	7.19825	17.7857	7.7145	19.1402	2.30549	-0.572434	14.5615	3	-6	-1.375	1.605	4.45	28.54	516.564	3.845	10.945	2.5
4	12.5589	46.8998	160.15	165.85	81.7	51.0147	74.5	50.0998	33.7493	23.3	9.9	6.8	5.6	21.4973	42.6305	31.12	0.237589	5.01562	3.93148	17.2	21.1	4.234	44.0189	22.1999	1.98574	20.6448	10.4117	18.2859	1.98284	-1.05953	13.6184	2	-8	-1	1.975	5	30.505	561.908	3.475	9.98	0.416667
5	12.7863	65.8	156.4	160	80.5	51.4706	73.9998	48.5998	33.5	25.7499	10.2	6.8	5.6	24.4437	46.046	31.6408	6.39759	7.03362	0.309199	129.197	175.897	27.2391	35.3186	15.6269	17.9233	23.2397	10.2825	26.9	2.26011	-0.799644	13.5859	2	-3.5	-2.375	1.955	4.7	25.355	718.742	3.875	10.395	3
30	15.5041	61.8	170.05	171.65	90.8	53.3961	76.3992	95.3	38.7997	26.8	9.8	6.7	5.3	22.2478	45.3079	33.5496	2.43907	4.53501	2.90845	50.9931	65.9931	13.6389	38.9919	17.5172	8.42882	24.097	10.8256	21.3715	2.22593	1.66478	13.8393	2	4	-1.15	2.5	6.31	39.15	838.719	3.4055	8.685	1
31	15.1397	87.75	185.15	186.9	93.999	50.7691	84.5	106.8	44	27.6	10.1498	7.7	5.7	27.9909	53.2652	33.604	3.26296	4.80309	1.92356	86.3923	110.488	19.9608	38.5743	15.0369	17.5156	33.8489	13.1949	25.5976	2.5653	2.1488	12.9909	1	-22.1	15.375	1.935	6.805	29.275	1029.64	4.0135	9.425	1
32	14.4548	66.95	178.05	176.4	90.05	50.5757	80.4	104.1	37.2997	26.2499	10.2498	7.2	5.6	25.23	46.0131	32.1212	1.758	4.7096	3.52188	49.59	61.99	14.4496	39.7283	18.5367	9.67403	26.5981	12.4103	21.1187	2.14322	1.05312	13.4017	2	-1	-4.75	2.0555	7.525	33.59	841.547	3.6565	9.8	4
33	14.5699	64.8	179.95	182.849	91.6996	50.9584	81.6996	102.449	37.4	26.3996	10.1	7	5.9	23.7403	45.9367	35.115	1.24296	3.95595	4.21933	36.2982	46.0982	9.526	40.9136	19.9691	6.17285	26.512	12.94	20.0111	2.04885	1.28746	13.2824	2	-11.5	-2.15	2.32	7.075	34.48	825.279	3.7045	8.65	2
34	14.5014	79.15	169.647	175.4	86.799	51.1646	79	96.05	37.3997	28	10.2	6.8	5.3	27.5504	50.8018	33.448	7.03839	6.08959	0.666699	126.39	160.79	21.9427	37.4361	14.025	17.3676	29.6307	11.1008	27.5017	2.66924	0.869569	13.6318	2	-5.5	-9.275	2.035	5.95	27.245	896.227	3.816	9.505	0.333333
35	15.4411	66.8999	185.95	182.9	94.0248	50.5646	81.7992	105.3	39.4	27.4499	10	6.7	5.5	23.9637	46.0846	33.5786	1.42564	2.87706	4.95459	39.4945	48.3929	9.673	40.7721	19.1429	6.47122	27.2765	12.8065	19.3479	2.12988	2.04921	13.3919	2	1.25	9.175	2.43	7.34	43.7	959.378	3.6045	8.9	5
36	15.9041	61.7998	173.7	172.5	91.4498	52.6481	77.1998	96.2498	38.2	28.3499	9.7	6.7	5.2	24.215	47.5839	32.1584	1.60061	3.97037	3.58435	37.0949	46.9934	10.1864	42.9152	17.6822	6.29516	26.5215	10.9276	20.4827	2.42702	1.9401	13.964	2	3	-1.975	2.25	7.935	36.045	804.775	3.4285	8.66	5
37	14.4192	62.95	169.5	171.249	85.5	50.4425	77.0488	98.35	37.7499	26.6499	9.8	7.2	5.6	22.5082	47.4212	33.9645	2.52839	5.5763	2.61433	59.7911	74.8889	16.5051	39.9479	17.8024	10.3899	25.1472	11.2066	21.9107	2.24396	0.44603	13.9731	2	-4	-2.6	2.945	5.385	35.675	815.367	3.854	8.595	1
38	15.5534	103.4	178.7	184.8	96.8996	54.2247	80.7499	96.0498	44.4	31.5493	11.2498	7.7	5.8	29.6257	56.2823	36.8802	6.1619	7.72898	0.1	143.858	195.058	32.4523	35.2739	13.2176	33.5557	36.4732	13.667	32.3796	2.6687	3.00027	12.5532	1	9.5	-3.45	1.805	8.965	24.215	1103.77	4.06	9.13	5
39	14.7562	95.7498	178.7	181.85	93.4	52.2664	80.6	99.1498	40.6	30.6	10.8	6.5	5.2	29.3072	54.5353	34.578	7.21199	6.03509	0.458069	185.285	222.784	41.8602	36.138	12.8278	40.081	34.602	12.2826	29.984	2.81715	2.00561	12.7506	1	1.5	1.05	1.64	8.49	24.765	1033.65	4.4875	9.745	4
40	13.5616	49	165.049	165.199	83.65	50.6818	74	94.2999	35.5	24.5	9.2	6.6	5.5	20.6021	39.3734	29.4226	1.49626	3.6558	4.4404	36.1926	44.7926	9.59816	39.2223	20.7833	4.7031	19.2189	10.1838	17.9874	1.8872	-0.357403	13.919	2	-7	-13.025	1.99	4.975	33.19	612.31	3.717	8.41	4.5
41	14.0438	62.7	176.85	178.95	87.899	49.7026	79.5998	103.45	38.2997	25.8	10.1498	7	5.6	21.9814	43.1115	29.8889	2.10666	3.61524	4.01019	62.9923	77.9923	17.0955	36.4064	19.4671	10.7189	22.8268	12.2059	20.0474	1.87015	0.528174	13.5157	2	-1.5	5.15	1.72	5.45	26.07	694.265	3.878	8.705	0.333333
42	13.7534	63.3	165.05	172.5	81.1999	49.1971	79.3993	95.7479	37.642	26.6499	9.8	6.99857	4.74947	22.2174	43.5549	30.1404	5.02073	5.52651	1.73927	110.39	142.59	31.2791	34.6177	15.1593	19.7997	21.913	9.59583	23.2366	2.2836	-0.368355	14.1218	3	0	8.2	1.57	4.795	23.82	670.092	4.3655	10.52	3
43	12.4	61.45	164.85	171.9	82.15	49.8332	74.4996	95.85	34.3997	24.5	10.1498	6.7	5.3	21.2876	44.2924	30.21	4.21213	4.94075	2.00338	99.5935	122.793	24.5183	35.2045	17.2809	15.0665	21.6332	10.6191	22.6123	2.03719	-0.892591	13.2926	2	7	4.775	1.555	4.425	23.465	645.558	4.0855	9.12	2
44	13.1918	47.8998	167.85	169.4	81.4497	48.5254	75.8	97.15	36.7494	26	9.3	6.4	5.3	18.5181	38.1787	29.8995	1.50021	2.93504	5.25579	40.1977	49.2958	12.5386	37.8243	21.3733	6.00595	18.1178	10.2378	17.0017	1.7697	-0.81432	14.0061	3	-4	3.675	1.745	4.08	26.73	537.205	4.078	9.5	2
45	13.6959	64.55	173.05	168.8	88	50.8524	73.2493	100.55	36.0499	27.3	9.7	6.6	4.8	21.9788	46.0756	31.9245	3.5681	3.85978	3.00234	86.493	110.293	21.58	37.4505	15.9059	13.9299	24.1743	10.2673	21.5552	2.3545	0.409601	13.2863	2	-3	11.65	1.845	6.29	27.77	737.918	4.3325	9.505	3
46	13.5671	64.6998	167.85	173.9	84.15	50.134	76.9992	96.3999	35.9	26.0996	10.1498	7.1	5.3	23.4324	45.7302	32.5552	3.82037	5.69992	2.02965	95.4816	120.181	24.6588	37.4104	16.8399	15.9542	24.2045	10.8954	22.9647	2.22153	-0.0913179	13.6584	2	12	3.35	1.675	6.235	22.185	660.243	4.261	8.9	3
47	13.0438	75.9999	160.4	167.65	85.0486	53.0228	76.3995	90	36.5494	26.7	10.3	6.9	5.2	26.1349	51.3894	31.2986	6.01103	6.82826	0.1	123.6	163.4	30.4	35.8655	13.397	23.104	27.2577	10.1817	29.5396	2.67713	-0.0399647	13.0838	2	-7	5.9	1.725	5.005	26.495	848.536	4.2945	8.405	3
48	13.6219	52.25	175.6	182.549	88.3	50.2847	79.2499	101.5	36.2997	24.7996	9.5	6.4	5.4	19.9932	42.2805	31.0626	0.753052	2.27627	5.80726	23.6976	29.4976	6.95171	41.1322	21.4978	3.63226	21.4915	11.2326	16.9448	1.91332	0.23936	13.3826	2	6.5	-3.975	2.115	4.91	37.95	698.243	4.033	8.285	4
49	13.6904	66.35	185.1	186.7	92.65	50.054	82.6998	105.9	37.8	27.4	10.7	7.2	5.7	21.534	41.845	32.1632	2.39089	3.51637	4.89325	72.6867	87.5856	19.3722	34.9043	20.6407	12.8534	23.159	13.6951	19.3655	1.69104	0.957181	12.7332	1	6	-4.375	1.9	7.75	31.5	807.625	3.5675	8.865	3
50	13.3014	66.7497	175.65	184.7	88.6	50.4413	82.149	101.9	38.4	28.8	10.0498	6.9	4.9	24.2071	44.8795	33.6814	2.39474	4.71454	3.12079	67.9894	83.9894	17.17	37.8527	16.3515	11.4609	25.2666	10.9146	21.6348	2.31494	0.30608	12.9953	1	13	14.9775	1.725	6.78	24.455	715.958	4.014	8.405	0.333333
51	15.0384	72.15	185.1	185.3	96.15	51.9449	80.7499	104	40.3	27.2499	10.2498	7.4	5.5	26.7163	47.4559	34.4989	1.3429	4.33352	3.97122	44.4	54.2	10.555	41.1707	17.9469	7.61543	29.7046	12.9487	21.0583	2.29402	2.18678	12.8516	1	9	3.9	2.475	8.95	40.51	996.091	3.675	7.955	3.5
52	15.1096	70.7994	177.15	184.2	89.95	50.7763	80.3995	103.35	39.4499	26.5	9.8	7.3	5.6	25.6286	46.6299	31.4747	2.08029	4.5973	2.76992	57.7974	72.3974	19.0067	38.1642	16.8556	13.4566	27.02	11.9336	22.5605	2.26419	1.4243	13.6853	2	4.5	-1.425	2.17	7.49	30.56	849.044	3.7	8.65	3
53	15.5315	66.75	176.35	181.8	92.95	52.7077	81.0499	100.449	38.5	27.3	10.1498	7.2	5.3	24.611	47.3336	33.247	1.96601	4.48837	3.24709	47.8959	60.7949	11.5093	40.5631	17.5123	7.68242	27.0758	11.6894	21.4635	2.31627	1.99806	13.5334	2	12	9.7	2.505	7.675	38.155	893.754	3.564	8.065	3
54	15.0932	67.7	165.5	171.65	89.4	54.0181	76.4	91.35	38.5	26.0499	10.1	7.6	5.3	24.3169	47.4628	31.5192	3.76023	6.37552	1.17371	82.9805	105.98	21.5037	37.3302	15.7186	14.558	25.2725	10.6415	24.7168	2.3749	1.37456	13.7186	2	12	13.2	1.88	6.995	25.415	740.36	3.877	8.8	3
55	14.2055	60.249	166.7	164.55	87.8995	52.7292	74.1	93	36.7	24.4499	9.2	6.6	5.2	22.553	43.8787	32.4699	2.34366	4.48358	2.55073	49.4965	61.8965	13.3462	37.8849	16.473	8.04095	22.8253	9.92478	21.681	2.29982	0.620818	13.5847	2	4	-5.85	2.135	7.905	36.125	785.52	3.441	7.695	7
56	14.4575	46.3	162.05	162	85.15	52.5455	74.5994	90.3498	35.5997	24.8	8.7	6.2	4.7	20.234	36.6645	26.7933	1.79067	2.83794	4.45862	45.0956	58.8956	8.4223	37.7716	18.4121	3.89952	17.4883	8.52482	17.6312	2.05145	0.230486	14.227	3	5.25	4.075	1.845	5.78	27.59	527.57	3.623	8.08	5
57	14.0877	53.1	175	181.5	85.3	48.7429	83.1993	105.6	35.4499	24.0499	9.1	6.7	5.6	20.5366	39.8159	30.4239	1.54909	2.62666	5.50593	46	57.2	12.907	38.6196	20.9514	6.85362	20.507	11.1252	17.3388	1.8433	0.105298	13.9824	2	6.25	8.45	2.05	6.85	35.16	683.016	3.8345	8.4	6
58	14.3945	85.65	185.15	191	91.6498	49.5003	86.3	110.2	39.5	30.6	10.3	7	5.2	26.6706	48.147	34.1694	4.26276	4.37527	2.17083	104.296	134.896	24.887	34.9371	14.5826	21.3157	29.9236	12.49	24.985	2.39581	1.43036	12.9642	1	6.25	1.05	1.985	7.315	30.465	1025.38	3.918	9.03	3
59	15.0658	63.85	176.05	172.9	92.8999	52.769	77.1	99	39.2	25.6996	10.1498	7.2	5.6	25.2292	46.7355	36.2664	1.2226	5.11003	3.66683	29.996	38.196	8.497	43.1619	18.9935	5.42533	27.5589	12.1273	20.601	2.27246	1.70739	13.3584	2	8.25	-3.075	2.29	7.67	41.98	897.309	3.3715	7.79	5
60	12.6932	48.3495	149.75	151	78.9989	52.7538	67.3499	83.2995	34.2499	22	9.5	6.3	5	22.4542	41.0517	32.0212	2.41536	6.56887	1.51331	54.0989	70.6989	14.7437	40.3258	17.5311	7.1285	19.4974	8.47621	21.5605	2.30024	-1.23608	13.9292	2	9.25	11.15	2.015	5.865	33.11	603.275	3.929	8.69	2
61	13.1068	47.0499	163.65	161.75	84.6981	51.7558	72.7499	95.2996	33.5	23.4	9.7	6.6	4.7	19.8354	39.5426	29.9827	1.86909	3.98334	4.60655	50.0956	60.4956	15.112	40.0815	19.8538	7.11019	18.8583	9.34122	17.5683	2.01883	-0.472406	13.5793	2	-5.75	-8.025	1.795	3.94	29.75	556.628	4.0405	9.47	8
185	13.5123	73.25	178.9	180.3	92.3999	51.6489	81.1992	99.05	41	29	10.8498	7.7	6.1	25.0067	46.2151	34.2217	2.91567	5.59661	2.72265	73.0364	90.0364	18.7129	36.7611	18.8781	13.7072	26.9275	13.8282	22.8869	1.94729	0.936551	12.5758	1	1	9.6	2.055	5.605	26.975	825.009	3.8915	9.075	0.333333
186	13.5096	54.4998	163.15	166.6	83.5	51.1799	73.5499	92.95	35.3	25.8	9.1	6.2	5	22.1956	40.2857	31.5232	3.56805	4.06209	2.92342	76.4763	96.4763	17.6839	37.5161	17.0415	9.6377	20.4462	9.28756	20.4749	2.20146	-0.314772	13.8244	2	3.5	4.85	1.65	4.74	23.35	571.268	3.994	9.335	5
187	15.7616	69.25	185	192	92.6	50.0541	83.8499	106.3	39.7494	28.0499	9.9	7.5	5.5	17.9994	44.4131	31.5286	2.06062	3.29559	4.40154	55.6972	73.2972	13.5677	33.1774	18.2279	9.39563	22.9753	12.6228	20.2337	1.82014	2.05298	13.7087	2	-5	5.675	1.94	6.76	27.8	792.063	3.7265	9	1
188	15.926	53.1998	166.95	168.95	84.35	50.5241	76.8992	95	36.3	24.3499	9.8	6.7	5.5	22.3035	40.3482	31.0341	1.24386	4.44919	3.91763	34.3965	41.9965	9.4513	39.7562	20.3525	5.02807	21.1502	10.8275	19.087	1.95338	0.891135	15.0349	3	8.5	-0.275	2.44	5.55	38.675	717.542	3.474	8.28	3
189	14.6685	63.3998	176.35	179.3	90.25	51.1767	79.3996	101	36.3997	27.7	10	6.5	5.5	21.0273	42.6044	32.9814	2.43932	3.37949	3.79802	61.1982	77.2974	16.6548	35.7505	18.731	10.5591	22.6658	11.8755	20.3863	1.90862	1.14873	13.5198	2	-1	10.55	2.27	5.655	31.61	773.052	3.6825	8.77	1
190	12.5973	44.2	166.6	174.7	84.15	50.5102	79	97.8991	37.1494	24.7996	9.1	6.7	5.2	20.6177	38.3535	26.9226	0.934429	3.0345	5.91584	27.3961	34.5961	8.27516	41.7628	22.2612	3.65762	18.4592	9.83944	15.9247	1.87604	-0.822942	13.4202	2	0.5	9.225	2.135	4.76	27.77	505.12	3.864	9.12	2
191	13.6603	50.3	175.2	174.1	89.85	51.2842	75.9	101.05	37.2	25.0499	9.7	6.8	5	19.3009	38.0056	28.0712	1.37789	2.25474	6.16661	35.3972	45.3972	10.7743	37.3036	21.3868	5.41949	18.7637	10.7576	16.387	1.74423	0.420558	13.2397	2	-3.25	4.35	2.265	5.44	25.31	548.906	3.5545	9.035	4
192	15.4849	40.1499	153.65	148.65	79.7	51.8711	68.4	88	31.5	22.396	9.1	6.6	5	18.6694	36.7685	29.9528	1.66075	4.68401	4.27	35.5973	44.7973	10.1865	41.8639	21.2381	4.08986	16.8083	8.52707	17.0067	1.97117	-0.035737	15.5207	3	-7	-9.125	1.805	3.205	20.46	393.81	3.9935	9.22	4
193	15.2301	58.95	169.05	174.6	88.5	52.3514	78.3495	97	35.9	25.1	9.3	6.9	5	21.8018	42.9195	30.6711	3.11413	4.17755	3.21975	74.0903	93.5891	19.0782	37.5304	16.831	11.2466	22.1242	9.92186	20.6278	2.22984	1.18376	14.0464	3	8.5	4.5	2.03	5.61	20.105	573.251	3.7885	8.695	5
194	14.4986	62.749	175.45	178.35	92.05	52.4651	79.4	101	41.4998	26.6	11	7	5.8	25.5254	47.7646	34.7186	2.33064	5.86494	16.7503	63.7951	81.4928	15.4024	44.35	20.8821	9.66486	27.8292	13.1033	20.3845	2.12383	1.28623	13.2124	2	13.5	-14.75	2.11	8.31	28.515	723.636	3.6135	8.975	5
195	13.7507	67.6497	163.1	163.65	88.35	54.1692	73.6	91.0982	35.9	24.5996	9.4	7	5.5	26.3526	46.7106	30.9087	3.72007	5.76172	0.905632	88.3871	116.187	21.2101	37.5524	15.0296	14.3486	25.4041	10.1675	25.4307	2.49856	0.564253	13.1864	2	13.25	-4.75	2.15	6.22	17.505	613.975	3.939	9.245	1
